# Supplementary material for: Intestinal fatty acid-binding protein, a biomarker of intestinal barrier dysfunction, increases with the progression of type 2 diabetes
Source: PeerJ. 2021 Feb 2;9:e10800. doi: 10.7717/peerj.10800 (PMC7863777; doi:10.7717/peerj.10800)
Supplement: Supplemental Information 1 [file peerj-09-10800-s001.xlsx]

## Sheet: Date
Case No.	outpatient=1,inpatient=2	diabetes=1，prediabetes=0	I-FABP	HbA1c	age	male=1,femal=0	FPG	FC-pep	FIns	2hPG	2hC-pep	2hIns	duration	ΔPG	ΔC-pep	ΔIns
1	1	1	787.451	6.4	68	1	7.5	2.24	10.13	12.14	14.18	203.3	0	4.64	11.94	193.17
2	1	0	1686.94	5.7	64	1	6.34	1.49	5	6.23	5.89	20.71	0	-0.11	4.4	15.71
3	1	0	728.239	5.1	42	0	7.05	1.22	3.7	8.96	7.48	37.6	0	1.91	6.26	33.9
4	1	1	2948.72	5.7	56	0	7.13	3.04	12.71	17.8	13.76	121.4	0	10.67	10.72	108.69
5	1	1	2486.17	6.2	64	1	9.08	1.44	3.29	13.7	8.22	42.82	0	4.62	6.78	39.53
6	1	0	1450.64	5.2	32	0	4.71	1.05	3.38	11.3	9.58	54.24	0	6.59	8.53	50.86
7	1	0	1356.72	5.4	29	0	5.59	3.16	23.83	9.82	10.39	125.1	0	4.23	7.23	101.27
8	1	1	814.717	9.4	23	0	12.38	4.28	24.16	19.47	6.53	48.69	0	7.09	2.25	24.53
9	1	0	1515.36	6.1	73	0	6.33	2.36	11.47	9.76	11.77	126.7	0	3.43	9.41	115.23
10	1	0	562.029	4.9	38	0	5.15	0.96	3.22	7.6	8.86	37.66	0	2.45	7.9	34.44
11	1	1	1545.79	6.6	40	1	8.35	2.61	14.5	15.62	7.15	62.83	0	7.27	4.54	48.33
12	1	1	611.465	9.6	23	1	11.57	2.97	12.4	21.26	7.38	52.4	0	9.69	4.41	40
13	1	0	1981.9	5	23	0	5.51	2.7	14.36	7.42	7.74	54.38	0	1.91	5.04	40.02
14	1	1	800.258	6.9	52	1	8.47	4.6	24.22	12.63	7.97	56.91	0	4.16	3.37	32.69
15	1	0	935.897	5.8	59	0	5.78	1.56	3.92	9.51	7.22	39.95	0	3.73	5.66	36.03
16	1	0	1225.76	5.9	50	0	6.61	1.63	4.59	6.93	8.73	51.12	0	0.32	7.1	46.53
17	1	0	1075.67	5.4	41	0	5.68	1.35	5.17	8.04	5.64	33.98	0	2.36	4.29	28.81
18	1	1	1237.47	6.5	62	0	8.54	2.99	7.9	18.3	10.94	53.58	0	9.76	7.95	45.68
19	1	1	904.5	6.4	53	1	7.75	2	4.3	9.42	8.76	43.01	0	1.67	6.76	38.71
20	1	1	930.389	6	51	0	7.37	1.97	7.24	16.58	7.35	55.44	0	9.21	5.38	48.2
21	1	0	1289.9	5.5	34	1	6.09	2.67	13.04	6.78	7.14	48.01	0	0.69	4.47	34.97
22	1	1	392.262	6.5	20	1	7.53	6.01	26.81	16.15	19.32	216.8	0	8.62	13.31	189.99
23	1	0	632.763	5.2	31	1	6.09	2.49	11.81	7.7	12.76	141.2	0	1.61	10.27	129.39
24	1	1	906.568	6	29	0	7.56	3.19	16.99	11.51	6.73	56.52	0	3.95	3.54	39.53
25	1	0	548.219	6	45	0	6.18	1.65	4.65	9.98	7.24	44.61	0	3.8	5.59	39.96
26	1	0	1152.83	5.7	43	1	5.29	3.34	19.79	5.49	10.19	113.1	0	0.2	6.85	93.31
27	1	0	1486.2	5.5	57	1	5.87	1.86	7.15	8.11	7.37	42.15	0	2.24	5.51	35
28	1	0	637.566	6.1	56	0	6.63	2.04	5.85	14.98	10.86	63.15	0	8.35	8.82	57.3
29	1	0	1588.68	5.9	64	0	6.5	2.39	6.94	8.47	9.96	48.51	0	1.97	7.57	41.57
30	1	0	984.706	5.5	49	0	6.21	1.88	5.23	7.14	11.59	67.44	0	0.93	9.71	62.21
31	1	1	2064.88	6.5	50	1	9.44	4.15	11.95	13.38	10.97	43.96	0	3.94	6.82	32.01
32	1	0	156.246	6.2	14	1	6.56	10.41	131.5	10.28	#NULL!	#NULL!	0	3.72	#NULL!	#NULL!
33	1	1	1589.64	6.5	56	1	6.98	1.83	5.83	11.48	6.47	35.11	0	4.5	4.64	29.28
34	1	0	1634.47	5.6	42	1	5.81	1.81	6.3	10.33	9.8	66.92	0	4.52	7.99	60.62
35	1	0	1688.27	6	55	0	6.48	1.92	6.63	7.32	8.24	63.82	0	0.84	6.32	57.19
36	1	1	1657.53	7.3	55	1	8.83	3.48	14.71	15.69	11.55	87.29	0	6.86	8.07	72.58
37	1	0	3042.25	5.7	38	1	6.29	2.66	11.43	8.81	9.73	76.1	0	2.52	7.07	64.67
38	1	1	412.438	10.9	31	1	14.81	1.57	4.69	20.96	2.01	7.33	0	6.15	0.44	2.64
39	1	0	3604.59	6	67	1	6.87	2.53	7.99	9.57	14.42	120.4	0	2.7	11.89	112.41
40	1	1	4796.84	7.6	49	1	7.76	1.9	6.89	15.73	6.69	49.84	0	7.97	4.79	42.95
41	1	1	1856.61	8.4	51	1	8.93	3.17	14.66	16.03	7.43	41.96	0	7.1	4.26	27.3
42	1	1	1476.79	8.9	54	1	11.45	2.5	10.32	20.7	5.36	32.25	0	9.25	2.86	21.93
43	1	1	1240.16	8.4	34	1	9.94	5.21	53.59	17.46	8.9	114	0	7.52	3.69	60.41
44	1	0	780.205	5.5	38	1	6.13	5.72	29.7	10.56	21.56	326.2	0	4.43	15.84	296.5
45	1	0	1467.29	5.2	28	1	4.92	3.49	20.92	8.01	17.62	203.1	0	3.09	14.13	182.18
46	1	0	702.912	4.1	42	1	4.77	2.18	6.6	5.71	6.77	25.89	0	0.94	4.59	19.29
47	1	0	1464.44	5.4	27	0	5.81	5.09	36.68	6.29	10.93	138	0	0.48	5.84	101.32
48	1	0	1255.68	5.9	69	1	6.55	3.02	13.74	10.55	14.54	210.7	0	4	11.52	196.96
49	1	0	2024.18	5.5	49	1	5.72	3.29	15.41	8.97	11.9	125.3	0	3.25	8.61	109.89
50	1	1	1266.77	6.9	65	1	6.87	3.33	8.88	14.97	11.32	70.77	0	8.1	7.99	61.89
51	1	0	1365.92	5.8	50	0	6.35	2.12	7.18	8.41	10.36	54.69	0	2.06	8.24	47.51
52	1	1	905.015	6.9	55	1	8.27	1.86	7.37	15.45	7.15	55.69	0	7.18	5.29	48.32
53	1	1	1327.91	8.4	56	1	8.99	2.42	11	18.61	4.18	26.65	0	9.62	1.76	15.65
54	1	0	1410.27	6.2	48	1	6.91	2.01	6.26	7.91	3.85	11.38	0	1	1.84	5.12
55	1	1	1233.83	10.8	48	1	14.58	3.49	16.62	13.62	3.61	12.26	0	-0.96	0.12	-4.36
56	1	1	1231.29	10.6	50	1	11.67	1.93	5.89	23.45	3.33	14.02	0	11.78	1.4	8.13
57	1	0	838.175	5.2	42	0	5.54	3.09	15.19	6.6	9.75	79.33	0	1.06	6.66	64.14
58	1	1	650.328	6.3	32	1	7.26	4.18	35.12	16.48	10.96	159.5	0	9.22	6.78	124.38
59	1	1	2302.31	8.1	68	1	7.73	1.33	2.13	18.41	4.56	15.03	0	10.68	3.23	12.9
60	1	1	1057.7	13.8	22	1	13.17	1.37	5.07	23.34	1.62	4.85	0	10.17	0.25	-0.22
61	1	1	1114.4	18.8	16	1	18.29	0.58	2.38	#NULL!	#NULL!	#NULL!	0	#NULL!	#NULL!	#NULL!
62	1	1	1394.12	9.6	30	1	14.05	2.81	15.99	23.25	4.68	28.25	0	9.2	1.87	12.26
63	1	1	877.455	8.1	34	1	11.65	3.31	15.13	21.31	6.2	36.67	0	9.66	2.89	21.54
64	1	1	1603.82	7.4	56	1	10.28	2.68	10.53	22.19	6.87	29.68	0	11.91	4.19	19.15
65	1	1	1629.48	11.1	50	1	12.85	3.44	15.08	21.78	5.48	27.93	0	8.93	2.04	12.85
66	1	1	3523.16	6.3	48	1	7.23	3.29	9.28	14.41	11.41	60.79	0	7.18	8.12	51.51
67	1	1	909.766	7.4	54	0	7.92	2.29	11.98	14.35	5.97	47.4	0	6.43	3.68	35.42
68	1	0	5221.39	6.1	77	1	5.98	3.5	11.51	12.41	15.58	129	0	6.43	12.08	117.49
69	1	1	883.157	9.1	61	1	9.83	2.94	9	17.12	8.27	46.95	0	7.29	5.33	37.95
70	1	1	1802.12	10.5	52	1	11.19	5.08	20.96	19.23	9.22	43.4	0	8.04	4.14	22.44
71	1	0	1118.84	5.8	36	0	5	4.03	19.35	7.22	13.85	107.3	0	2.22	9.82	87.95
72	1	1	926.239	12.2	44	1	15.93	4.19	16.08	25.92	5.52	21.79	0	9.99	1.33	5.71
73	1	1	1302.25	8.1	43	1	8.32	2.26	5.64	19.25	7.52	28.96	0	10.93	5.26	23.32
74	1	1	1066.57	6.5	40	1	7.06	4.41	20.76	15.05	13.64	91.41	0	7.99	9.23	70.65
75	1	1	784.323	6.9	26	0	8.7	5.06	31.31	13.55	13.37	128.7	0	4.85	8.31	97.39
76	1	0	1108.38	5.6	43	0	5.75	2.9	10.84	5.41	5.85	17.94	0	-0.34	2.95	7.1
77	1	1	1166.35	7.5	35	1	10.89	3.62	8.6	17.98	7.04	20.86	0	7.09	3.42	12.26
78	1	1	1685.55	7.9	43	0	9.66	2.85	12.95	19.49	6.15	32.31	0	9.83	3.3	19.36
79	1	1	1349.45	6.4	28	1	7.03	6.54	48.93	14.07	16.11	213.3	0	7.04	9.57	164.37
80	1	0	611.681	5.7	34	1	5.4	0.96	1.74	6.82	5.37	12.72	0	1.42	4.41	10.98
81	1	1	1201.52	6.5	54	0	6.15	3.14	14.78	8.16	9.43	55.23	0	2.01	6.29	40.45
82	1	0	1757.46	5.5	57	0	5.03	1.88	6.1	6.94	5.83	32.72	0	1.91	3.95	26.62
83	1	1	1582.6	6.8	49	0	6.11	4.2	13.28	14.26	16.13	109.9	0	8.15	11.93	96.62
84	1	0	1057.07	5.7	29	0	5.15	2.11	8.49	8.71	10.3	71.91	0	3.56	8.19	63.42
85	1	1	2378.97	13.1	47	1	19.46	1.54	1.63	36.21	3.09	7.04	0	16.75	1.55	5.41
86	1	1	750.745	10.32	29	0	10.77	3.36	19.19	18.19	5.15	30.71	0	7.42	1.79	11.52
87	1	1	1178.71	9.2	42	1	10.72	2.81	11.95	19.38	7.03	46.17	0	8.66	4.22	34.22
88	1	0	1142.91	5.4	55	1	6.31	1.69	5.17	11.66	8.04	36.82	0	5.35	6.35	31.65
89	1	1	926.239	8.3	31	1	8.33	2.58	8.42	13.03	5.5	20.36	0	4.7	2.92	11.94
90	1	0	789.709	5	59	0	5.34	2.02	8.81	7.21	7.42	43.17	0	1.87	5.4	34.36
91	1	1	1191.38	5.4	49	1	8	2.28	5.14	10.95	7.08	24.19	0	2.95	4.8	19.05
92	1	0	1360.54	5.7	47	0	6.18	2.36	11.43	12.4	15.11	166.9	0	6.22	12.75	155.47
93	1	0	1344.38	6	63	0	5.85	4.83	19.67	14.14	18.46	160.7	0	8.29	13.63	141.03
94	1	0	2959.3	5	37	1	6.58	3.94	19.13	7.83	15.5	121	0	1.25	11.56	101.87
95	1	1	794.143	6	49	1	8.42	2.86	6.17	8.71	10.19	35.04	0	0.29	7.33	28.87
96	1	1	1531.6	8.1	56	1	7.96	2.53	6.44	14.04	7.14	32.99	0	6.08	4.61	26.55
97	1	1	610.414	6	37	0	8.84	3.81	13.35	14.34	11.15	61.4	0	5.5	7.34	48.05
98	1	0	1628.53	6.2	25	0	5.15	9.59	60.61	8.46	34.12	592.9	0	3.31	24.53	532.29
99	1	0	1723.75	5.8	59	0	6.1	3.35	11.67	14.49	12.75	99.15	0	8.39	9.4	87.48
100	1	0	2428.24	5.8	34	1	6.61	2.81	10.51	6.51	8.77	42.64	0	-0.1	5.96	32.13
101	1	1	716.097	6.8	72	0	7.9	2.81	9.98	10.66	7.04	36.59	0	2.76	4.23	26.61
102	1	0	925.401	5.8	33	1	7.29	2.66	9.28	9.65	9.75	64.34	0	2.36	7.09	55.06
103	1	0	741.432	5.2	45	0	5.25	2.38	7.25	7.94	14.6	112.9	0	2.69	12.22	105.65
104	1	1	1388.63	10.7	40	1	13.36	3.58	12.87	21.36	5.48	27.39	0	8	1.9	14.52
105	1	0	4851.51	5.6	48	1	6.61	2.87	9.96	9.54	10.41	48.73	0	2.93	7.54	38.77
106	1	0	1470.11	5.2	55	0	5.57	1.51	3.46	6.95	8.85	33.02	0	1.38	7.34	29.56
107	1	0	974.056	5.7	55	1	6.99	2.26	6.55	11.36	9.41	51.18	0	4.37	7.15	44.63
108	1	0	1223.09	5.1	26	0	5.68	1.9	9.83	7.66	13.25	136.9	0	1.98	11.35	127.07
109	1	0	1479.9	5.1	29	0	4.86	1.61	6.44	10.67	12.73	113.4	0	5.81	11.12	106.96
110	1	0	2877.95	5.7	39	0	6.26	1.88	6.24	4.26	8.72	43.93	0	-2	6.84	37.69
111	1	0	1187.97	5.5	53	1	6.69	2.89	7.67	7.78	16.51	85.08	0	1.09	13.62	77.41
112	1	0	1333.36	5.4	64	0	6.03	1.6	5.01	8.98	10.32	59.19	0	2.95	8.72	54.18
113	1	0	1845.53	5.4	59	0	5.67	3.48	11.66	11.42	14.17	95.78	0	5.75	10.69	84.12
114	1	0	1483.07	5.4	43	1	5.85	2.43	5.51	7.28	12.3	64.17	0	1.43	9.87	58.66
115	1	1	1982.29	5.8	40	1	9.08	3.32	14.73	17.38	11.8	91.88	0	8.3	8.48	77.15
116	1	1	808.225	6.2	33	0	7.6	4.41	13.91	14.74	15.27	96.06	0	7.14	10.86	82.15
117	1	1	580.784	6.5	56	1	8.66	3.47	10.54	14.63	12.93	68.75	0	5.97	9.46	58.21
118	1	0	1221.94	5.4	41	1	6.61	3.9	14.59	6.13	8.7	42.19	0	-0.48	4.8	27.6
119	1	0	472.245	4.6	30	0	5.16	1.94	4.07	5.5	8.57	32.9	0	0.34	6.63	28.83
120	1	0	566.676	6	57	0	6.64	3.03	12.94	12.58	12.67	87.19	0	5.94	9.64	74.25
121	1	0	1287.58	6	58	0	6.56	2.75	10.28	11.31	9.19	58.33	0	4.75	6.44	48.05
122	1	1	1577.78	6.4	50	1	7.8	2.48	7.61	7.9	5.54	18.4	0	0.1	3.06	10.79
123	1	0	2061.46	5.3	72	0	5.82	2.98	11.46	9.35	12.42	59.93	0	3.53	9.44	48.47
124	1	0	1859.93	6.4	51	0	6.4	1.95	4.56	14.68	9.74	59.66	0	8.28	7.79	55.1
125	1	0	1244.68	5.4	61	0	5.29	1.55	3.63	7.3	7.24	20.28	0	2.01	5.69	16.65
126	1	0	1354.37	5.5	32	0	5.93	2.98	14.22	9.21	11.17	96.91	0	3.28	8.19	82.69
127	1	0	481.17	5.6	31	0	5.12	0.98	2.31	5.33	2.49	4.59	0	0.21	1.51	2.28
128	1	0	1396.12	5.1	30	1	5.44	1.27	4.42	8.21	10.37	73.09	0	2.77	9.1	68.67
129	1	0	2222.11	5.7	41	1	5.62	3.49	12.46	10.85	18.72	202.6	0	5.23	15.23	190.14
130	1	1	1149.1	6.2	44	1	7.64	3.9	15.81	13.03	12.31	110.2	0	5.39	8.41	94.39
131	1	0	1017.82	5.3	51	1	5.71	4.6	26.8	9.25	18.68	276.5	0	3.54	14.08	249.7
132	1	0	515.142	5.3	32	0	5.05	1.52	13.84	9.6	5.13	66.24	0	4.55	3.61	52.4
133	1	0	1884.11	6.1	75	0	6.27	3.49	19.05	11.3	20.16	218.8	0	5.03	16.67	199.75
134	1	0	922.522	5.9	46	1	6.45	2.05	13.58	8.5	12.68	170.4	0	2.05	10.63	156.82
135	1	0	1708.78	5.5	53	0	4.89	2.74	14.09	6.83	7.72	50.14	0	1.94	4.98	36.05
136	1	0	1046.32	5.7	32	1	6.6	3.16	9.13	10.3	8.02	36.03	0	3.7	4.86	26.9
137	1	0	854.577	5.7	25	1	5.01	4.31	26.93	5.64	6.07	30.64	0	0.63	1.76	3.71
138	1	0	1460.61	5.5	19	1	5.5	5.76	46.78	8.52	24.84	452	0	3.02	19.08	405.22
139	1	0	1227.99	6	71	0	6.1	3.42	16.15	9.41	17.15	137.1	0	3.31	13.73	120.95
140	1	0	1696.11	5.4	49	0	5.13	2.19	10.78	5.32	5.65	18	0	0.19	3.46	7.22
141	1	0	2136.6	5.5	58	0	4.73	1.7	5.91	3.62	4.57	16.4	0	-1.11	2.87	10.49
142	1	0	1108.22	5.3	47	1	6.47	1.91	7.19	7.57	7.89	46.07	0	1.1	5.98	38.88
143	1	0	1452.84	5.7	63	0	6.72	2.92	14.42	9.57	17.39	217.7	0	2.85	14.47	203.28
144	1	0	723.007	6.3	51	0	6.81	2.22	10.21	11.7	7.65	43.63	0	4.89	5.43	33.42
145	1	0	529.249	5.3	32	1	5.68	1.63	5.37	9.34	10.29	66.45	0	3.66	8.66	61.08
146	1	0	1854.75	6.1	29	1	6.79	4.75	40.52	11.62	16.71	413.3	0	4.83	11.96	372.78
147	1	0	948.433	4.8	29	1	5.94	2.42	11.14	6.78	11.29	77	0	0.84	8.87	65.86
148	1	0	1490.26	5	26	1	5.7	2.63	15.58	8.3	9.95	117	0	2.6	7.32	101.42
149	1	0	1404.47	5.4	34	1	5.41	1.92	10.54	5.24	6.07	42.97	0	-0.17	4.15	32.43
150	1	0	1524.81	5.2	21	1	5.02	6.8	61.06	5.54	14.58	229	0	0.52	7.78	167.94
151	1	1	1716.27	6	72	0	8.17	2.78	13.83	16.44	13.97	141.2	0	8.27	11.19	127.37
152	1	0	1616.65	5.7	31	0	6.12	1.66	7.03	6.76	5.05	27.58	0	0.64	3.39	20.55
153	1	0	1526.54	5.5	55	1	6.2	3.71	21.76	9.19	11.81	140.7	0	2.99	8.1	118.94
154	1	0	1353.51	6	58	0	6.42	2.09	9.83	13.33	13.03	105.9	0	6.91	10.94	96.07
155	1	0	1881.81	5.7	71	1	6.17	1.65	5.73	6.59	7.26	28.42	0	0.42	5.61	22.69
156	1	1	4733.47	5.5	69	1	7.63	2.93	12.03	11.2	10.21	68.86	0	3.57	7.28	56.83
157	1	0	819.454	6.4	50	0	6.75	2.72	13.21	14.1	9.21	74.01	0	7.35	6.49	60.8
158	1	0	1516.17	5.5	71	0	5.13	1.16	3.15	5.58	5.11	22.39	0	0.45	3.95	19.24
159	2	1	1052.74	7.5	51	1	6.92	2.06	6.21	16.71	7.76	52.98	3	9.79	5.7	46.77
160	2	1	697.857	7.1	57	1	6.45	1.9	#NULL!	15.84	10.62	#NULL!	0	9.39	8.72	#NULL!
161	2	1	1121.41	8.6	76	1	9.65	2.34	6.88	18.64	5.08	18.58	16	8.99	2.74	11.7
162	2	1	1549.84	9.3	47	1	10.6	2.48	10.94	23.11	4.37	26.09	6	12.51	1.89	15.15
163	2	1	1008.64	8.8	52	0	7.7	1.87	4.68	20.76	5.62	31.08	9	13.06	3.75	26.4
164	2	1	1616.23	15.8	55	1	5.88	0.65	#NULL!	14.54	3.08	#NULL!	0	8.66	2.43	#NULL!
165	2	1	923.87	9.4	41	1	9.44	2.05	9.27	21.38	4.08	28.67	6	11.94	2.03	19.4
166	2	1	2198.1	11.6	77	1	14.08	1.48	4.56	29	2.12	6.8	0	14.92	0.64	2.24
167	2	1	1801.23	7.8	39	0	8.43	2.07	#NULL!	17.11	3.58	#NULL!	6	8.68	1.51	#NULL!
168	2	1	1838.82	7.1	55	0	4.78	1.04	6.23	14.37	5.84	37.75	3	9.59	4.8	31.52
169	2	1	728.123	8.6	71	0	10.32	3.47	#NULL!	13.06	9.69	#NULL!	10	2.74	6.22	#NULL!
170	2	1	4438.04	5.9	71	1	6.97	2.17	#NULL!	17.73	7.82	#NULL!	12	10.76	5.65	#NULL!
171	2	1	1199.02	8.4	88	1	8.86	1.86	#NULL!	19.03	3.77	#NULL!	20	10.17	1.91	#NULL!
172	2	1	2280.11	6.9	56	1	3.92	0.42	#NULL!	15.27	3.32	#NULL!	16	11.35	2.9	#NULL!
173	2	1	2203.79	8.8	49	1	8.8	1.65	5.21	20.59	4.94	23.71	10	11.79	3.29	18.5
174	2	1	2682.01	8.9	34	1	10.42	1.56	3.18	23.98	2.64	6.67	1	13.56	1.08	3.49
175	2	1	2277.5	9.7	54	0	8.35	0.65	#NULL!	28.51	2.99	#NULL!	22	20.16	2.34	#NULL!
176	2	1	1731.59	10.1	61	1	11.9	0.9	3.03	25.97	3.32	20.57	17	14.07	2.42	17.54
177	2	1	3001.91	12.7	66	1	3.56	0.06	9.44	26.15	0.48	11.58	20	22.59	0.42	2.14
178	2	1	837.142	5.6	69	1	4.99	1.84	5.21	7.46	6.51	38.69	3	2.47	4.67	33.48
179	2	1	2641.17	7.6	82	0	8.53	1.74	11.22	13.95	4.34	31.13	26	5.42	2.6	19.91
180	2	1	1036.47	6.7	51	1	6.59	2.29	106	17.92	5.14	222.7	6	11.33	2.85	116.7
181	2	1	1177.22	7.3	63	1	5.65	2.75	13.67	12.27	7.5	75.39	10	6.62	4.75	61.72
182	2	1	1795.86	9.6	67	0	6.96	1.78	5.93	13.7	5.42	23.02	10	6.74	3.64	17.09
183	2	1	2742.87	8	59	1	4.93	0.74	1.71	22.24	4.18	16.96	10	17.31	3.44	15.25
184	2	1	3176.34	6.4	75	1	5.33	2.56	11.24	8.61	9.66	66.17	1	3.28	7.1	54.93
185	2	1	2465.28	9.9	56	1	15.72	1.52	#NULL!	20.55	2.51	#NULL!	12	4.83	0.99	#NULL!
186	2	1	4935.14	6.9	75	0	6.02	2.51	#NULL!	20.5	12.28	#NULL!	12	14.48	9.77	#NULL!
187	2	1	1554.72	5.2	55	0	5.11	2.31	9.57	#NULL!	#NULL!	#NULL!	1	#NULL!	#NULL!	#NULL!
188	2	1	1578.64	7.5	49	1	9.13	3.9	13.62	15.5	10.07	62.24	2	6.37	6.17	48.62
189	2	1	3522.28	8	54	1	8.44	2.6	7.87	20.44	7.95	38.46	8	12	5.35	30.59
191	2	1	1349.37	6.8	70	0	7.02	1.58	4.24	13.22	3.64	22.22	8	6.2	2.06	17.98
192	2	1	1811.32	6.3	52	0	7.55	1.57	7.62	20.88	6.95	54.61	7	13.33	5.38	46.99
193	2	1	1901.95	8.1	49	1	8.22	2.81	#NULL!	24.34	5.84	#NULL!	2	16.12	3.03	#NULL!
194	2	1	1420.75	5.5	61	1	4.94	2.21	7.67	#NULL!	#NULL!	#NULL!	1	#NULL!	#NULL!	#NULL!
195	2	1	2645.09	7.4	66	0	5.18	0.92	#NULL!	20.25	4.86	#NULL!	19	15.07	3.94	#NULL!
196	2	1	676.599	6.7	38	1	7.69	2.88	12.44	14.86	7.53	50.19	5	7.17	4.65	37.75
197	2	1	1372.56	9.7	55	1	4.99	2.37	#NULL!	23.18	6.93	#NULL!	5	18.19	4.56	#NULL!
198	2	1	2193.55	7.5	54	0	6.66	2.71	10.82	15.34	5.97	47.31	5	8.68	3.26	36.49
199	2	1	1719.99	12.2	39	0	10.48	1.78	#NULL!	16.48	2.94	#NULL!	12	6	1.16	#NULL!
200	2	1	1249.17	8.1	55	0	5.42	0.33	#NULL!	15.12	2.76	#NULL!	13	9.7	2.43	#NULL!
201	2	1	2411.81	9.1	69	0	7.77	1.34	35.07	15.9	2.73	79.22	20	8.13	1.39	44.15
202	2	1	1882.62	9.1	56	1	5.39	1.53	5.29	16.77	5.6	48.5	4	11.38	4.07	43.21
203	2	1	1200.01	6.9	69	1	6.73	1.85	5.16	17.76	5.72	34.34	13	11.03	3.87	29.18
204	2	1	2125.11	6.1	34	1	4	0.66	#NULL!	11	4.34	#NULL!	6	7	3.68	#NULL!
205	2	1	1848.88	10.3	63	0	10.29	3.55	19.8	24.15	8.31	78.07	10	13.86	4.76	58.27
206	2	1	1532.32	6.5	61	0	6.83	2.23	10.53	12.52	7.69	70.31	2	5.69	5.46	59.78
207	2	1	1121.45	5.5	65	1	6.03	2.69	8.93	11.44	10.52	84.58	1	5.41	7.83	75.65
208	2	1	1990.58	10	59	0	8.88	2.1	#NULL!	22.85	5.43	#NULL!	10	13.97	3.33	#NULL!
209	2	1	4783.71	7.2	53	1	5.01	0.33	#NULL!	22.08	1.89	#NULL!	18	17.07	1.56	#NULL!
210	2	1	2090.82	7.1	60	1	4.86	1.28	#NULL!	20.25	5.38	#NULL!	10	15.39	4.1	#NULL!
211	2	1	1591.88	7	42	1	7.17	3.14	16.91	16.18	9.77	89.82	1	9.01	6.63	72.91
212	2	1	1980.33	9.5	43	0	8.6	0.92	#NULL!	21.69	2.15	#NULL!	10	13.09	1.23	#NULL!
213	2	1	1847.43	12.5	38	1	11.24	0.9	7.66	20.49	1.78	12.22	10	9.25	0.88	4.56
214	2	1	1912.76	11.9	55	0	12.57	0.78	3.43	29.29	3.47	27.83	3	16.72	2.69	24.4
215	2	1	1105.12	11.6	31	1	6.55	3.68	22.19	9.72	7.51	49.81	0	3.17	3.83	27.62
216	2	1	1168.52	9.3	65	0	6.34	2.01	#NULL!	18.62	6.08	#NULL!	10	12.28	4.07	#NULL!
217	2	1	2616.65	6.7	55	1	5.84	1.45	3.35	13.57	6.15	31.06	1	7.73	4.7	27.71
218	2	1	4055.49	9.2	56	1	7.43	0.73	#NULL!	19.7	2.99	#NULL!	12	12.27	2.26	#NULL!
219	2	1	1505.42	5.6	54	0	5.51	4.13	14.65	9.73	33.29	259.9	1	4.22	29.16	245.25
220	2	1	1050.04	6.1	79	1	6.41	2.48	7.61	11.71	16.64	159.2	19	5.3	14.16	151.59
221	2	1	3380.74	7.8	72	1	8.27	1.63	7.24	22.59	6.43	54.74	12	14.32	4.8	47.5
222	2	1	2525.7	8.7	70	0	8.5	1.29	#NULL!	20.7	4.12	#NULL!	19	12.2	2.83	#NULL!
223	2	1	1663.94	6	63	1	5.79	1.48	4.16	9.91	4.17	19	3	4.12	2.69	14.84
224	2	1	3308.69	8.5	62	1	6.34	0.7	#NULL!	19.95	1.87	#NULL!	17	13.61	1.17	#NULL!
225	2	1	1419.59	9.2	67	0	8.05	1.65	#NULL!	20.96	4.33	#NULL!	16	12.91	2.68	#NULL!
226	2	1	2014.92	7.7	51	0	9.18	1.15	#NULL!	18.97	4.07	#NULL!	8	9.79	2.92	#NULL!
227	2	1	2812	10.1	65	0	8.58	3.21	#NULL!	27.23	6.39	#NULL!	18	18.65	3.18	#NULL!
228	2	1	5092.42	8.3	75	0	9.03	2.77	#NULL!	16.99	5.17	#NULL!	20	7.96	2.4	#NULL!
229	2	1	2594.87	7.9	75	1	8.76	1.4	2.96	24.38	6.03	28.25	8	15.62	4.63	25.29
230	2	1	2722.01	9.7	72	1	11.75	1.21	#NULL!	22.85	2.2	#NULL!	21	11.1	0.99	#NULL!
231	2	1	838.036	8.7	29	1	8.73	1.53	#NULL!	16.62	4.72	#NULL!	12	7.89	3.19	#NULL!
232	2	1	1277.41	5.2	53	1	3.7	1.22	#NULL!	9.17	6.78	#NULL!	3	5.47	5.56	#NULL!
233	2	1	1697.24	7.6	52	0	8.23	1.98	#NULL!	19.69	4.6	#NULL!	8	11.46	2.62	#NULL!
234	2	1	816.58	8.1	39	1	12.07	2.31	6.94	22.06	2.65	10.95	0	9.99	0.34	4.01
235	2	1	1444.89	8.6	52	1	8.52	0.6	#NULL!	17.27	1.62	#NULL!	18	8.75	1.02	#NULL!
236	2	1	1223.29	14.5	56	1	14.83	2.66	#NULL!	30.32	5.19	#NULL!	5	15.49	2.53	#NULL!
237	2	1	1131.06	7.9	48	1	10.24	2.21	#NULL!	22.18	5.7	#NULL!	8	11.94	3.49	#NULL!
238	2	1	2953.22	7.9	71	1	9.68	0.62	#NULL!	19.54	1.54	#NULL!	22	9.86	0.92	#NULL!
239	2	1	1154.75	8.6	26	1	11.76	2.35	7.91	20.02	5.92	30.04	1	8.26	3.57	22.13
240	2	1	2909.35	5.4	54	1	5.67	3.62	15.22	8.18	7.99	49.57	0	2.51	4.37	34.35
241	2	1	1824.38	10.7	47	1	14.82	3.76	14.3	20.36	3.91	17.18	2	5.54	0.15	2.88
242	2	1	1295.66	6.1	55	0	5.42	1.65	4.98	7.07	6.82	32.99	2	1.65	5.17	28.01
243	2	1	1142.26	10	53	0	8.05	1.74	#NULL!	20.6	5.07	#NULL!	12	12.55	3.33	#NULL!
244	2	1	2252.54	10.8	72	0	16.43	1.45	5.22	27.22	3.33	21.28	14	10.79	1.88	16.06
245	2	1	3154.05	6.8	56	1	6.02	2.05	7	11.99	6.11	37.42	12	5.97	4.06	30.42
246	2	1	1165.34	11.5	59	0	13.19	1.36	#NULL!	24.99	4.07	#NULL!	10	11.8	2.71	#NULL!
247	2	1	1505.74	6.5	56	1	6.1	2.75	6.66	10.61	9.88	63.71	0	4.51	7.13	57.05
248	2	1	3121.02	8.5	57	1	9.03	3.77	#NULL!	15.75	3.59	#NULL!	17	6.72	-0.18	#NULL!
249	2	1	2199.72	7.3	29	1	7.66	4.51	20.02	14.24	11.11	111.5	1	6.58	6.6	91.48
250	2	1	5200.67	11.3	32	1	6.39	2.95	#NULL!	12.06	8.28	#NULL!	0	5.67	5.33	#NULL!
251	2	1	2977.24	10.5	79	0	8.2	1.02	#NULL!	#NULL!	#NULL!	#NULL!	30	#NULL!	#NULL!	#NULL!
252	2	1	1417.03	7.6	66	1	8.64	3.01	11.7	19.11	10.75	80.84	1	10.47	7.74	69.14
253	2	1	1605.65	6.5	72	0	5.91	3.12	14.73	20.99	12.76	146.4	10	15.08	9.64	131.67
254	2	1	1821.81	8.6	63	0	17.35	2.71	#NULL!	22.52	11.64	#NULL!	14	5.17	8.93	#NULL!
255	2	1	5915.12	8.2	65	0	3.56	0.38	#NULL!	19.24	4.31	#NULL!	18	15.68	3.93	#NULL!
256	2	1	2530.18	6.3	68	1	7.04	3.26	10.32	9.59	11.73	43.03	3	2.55	8.47	32.71
257	2	1	2119	7.6	64	1	10.4	2.34	#NULL!	21.51	4.47	#NULL!	9	11.11	2.13	#NULL!
258	2	1	3562.96	6.2	66	1	4.61	0.74	2.4	12.61	4.15	15.53	14	8	3.41	13.13
259	2	1	1823.41	10.3	55	1	4.04	0.34	#NULL!	15.8	1.29	#NULL!	16	11.76	0.95	#NULL!
260	2	1	5070.33	6.3	61	1	4.55	1.27	#NULL!	19.47	6.25	#NULL!	15	14.92	4.98	#NULL!
261	2	1	4571.39	9.8	80	0	6.18	0.99	#NULL!	18.3	2.35	#NULL!	28	12.12	1.36	#NULL!
262	2	1	742.285	6.6	44	0	6.91	3.76	16.69	13.59	8.37	73.18	2	6.68	4.61	56.49
263	2	1	1130.24	9.2	55	1	10.5	2.59	#NULL!	21.37	5.51	#NULL!	13	10.87	2.92	#NULL!
264	2	1	3579.23	10.7	48	1	12.72	0.78	#NULL!	31.64	2.05	#NULL!	13	18.92	1.27	#NULL!
265	2	1	1537.93	6.4	75	0	6.09	2.36	#NULL!	12.69	9.3	#NULL!	11	6.6	6.94	#NULL!
266	2	1	4194.41	7.9	67	0	6.95	2.22	#NULL!	18.6	3.5	#NULL!	15	11.65	1.28	#NULL!
267	2	1	1820.49	7	67	0	6.62	2	#NULL!	19.1	8.01	#NULL!	10	12.48	6.01	#NULL!
268	2	1	2471.15	7.2	58	1	8.36	1.94	4.74	20.03	5.96	21.49	18	11.67	4.02	16.75
269	2	1	2888.66	8.2	69	0	5.82	0.95	#NULL!	19.55	3.97	#NULL!	16	13.73	3.02	#NULL!
270	2	1	1836.97	10.5	55	0	8.69	1.65	#NULL!	24.38	4.73	#NULL!	15	15.69	3.08	#NULL!
272	2	1	2317.51	6.8	87	0	7.06	1.29	#NULL!	13.57	3.97	#NULL!	10	6.51	2.68	#NULL!
273	2	1	714.316	8.5	50	0	#NULL!	3.06	#NULL!	11.38	4.09	#NULL!	10	#NULL!	1.03	#NULL!
274	2	1	1949.11	11.4	62	1	15.1	2.09	6.38	25.76	3.38	12.51	6	10.66	1.29	6.13
275	2	1	5007.25	5.6	55	0	5.44	4.05	18.95	14.37	9.68	83.36	5	8.93	5.63	64.41
276	2	1	1139.11	9.2	49	1	13.52	1.64	3.27	23.34	4.13	9.93	8	9.82	2.49	6.66
277	2	1	3280.83	5.7	61	0	5.01	2.39	6.49	10.17	9.55	43.18	2	5.16	7.16	36.69
278	2	1	1076.07	6.6	45	1	7.24	3.54	9.74	16.75	9.51	55.44	8	9.51	5.97	45.7
279	2	1	2036.53	8.8	64	1	12.71	1.59	7.93	20.91	2.1	11.75	3	8.2	0.51	3.82
280	2	1	900.263	7.1	70	0	5.6	2.83	14.26	14.39	13.13	108.7	5	8.79	10.3	94.44
281	2	1	1159.7	8.7	41	1	9.02	2.68	8.35	19.77	6.72	37.62	2	10.75	4.04	29.27
282	2	1	1821.13	7.6	56	0	7.07	3.46	17.63	18.7	13.62	169.4	8	11.63	10.16	151.77
