# Supplementary material for: Intestinal fatty acid-binding protein, a biomarker of intestinal barrier dysfunction, increases with the progression of type 2 diabetes
Source: PeerJ. 2021 Feb 2;9:e10800. doi: 10.7717/peerj.10800 (PMC7863777; doi:10.7717/peerj.10800)
Supplement: Supplemental Information 2 [file peerj-09-10800-s002.xlsx]

## Sheet: Sheet1
Case No.	Retinopathy (Positive=1, Negative=0)	Neuropathy (Positive=1, Negative=0)	Nephropathy (Positive=1, Negative=0)	I-FABP	Duration
159	0	0	1	1052.74	3
160	0	1	0	697.857	0
161	0	1	0	1121.41	16
162	0	0	0	1549.84	6
163	1	1	0	1008.64	9
164	0	0	0	1616.23	0
165	0	0	0	923.87	6
166	0	1	0	2198.1	0
167	1	0	0	1801.23	6
168	0	0	0	1838.82	3
169	0	0	1	728.123	10
170	1	0	0	4438.04	12
171	0	1	0	1199.02	20
172	1	0	0	2280.11	16
173	1	1	1	2203.79	10
174	0	0	0	2682.01	1
175	1	1	1	2277.5	22
176	1	1	0	1731.59	17
177	0	1	0	3001.91	20
178	0	1	0	837.142	3
179	1	0	1	2641.17	26
180	1	0	1	1036.47	6
181	0	1	0	1177.22	10
182	0	1	1	1795.86	10
183	0	0	0	2742.87	10
184	0	1	0	3176.34	1
185	0	1	0	2465.28	12
186	0	0	1	4935.14	12
187	0	0	0	1554.72	1
188	0	0	0	1578.64	2
189	1	1	0	3522.28	8
191	0	0	0	1349.37	8
192	0	0	1	1811.32	7
193	0	0	1	1901.95	2
194	0	0	0	1420.75	1
195	0	0	0	2645.09	19
196	0	0	0	676.599	5
197	0	1	0	1372.56	5
198	0	0	0	2193.55	5
199	1	1	1	1719.99	12
200	0	0	0	1249.17	13
201	1	1	0	2411.81	20
202	1	1	0	1882.62	4
203	0	0	0	1200.01	13
204	1	1	1	2125.11	6
205	0	0	0	1848.88	10
206	0	0	0	1532.32	2
207	0	0	0	1121.45	1
208	1	0	0	1990.58	10
209	1	0	1	4783.71	18
210	0	0	0	2090.82	10
211	0	0	1	1591.88	1
212	1	0	1	1980.33	10
213	1	1	1	1847.43	10
214	1	1	1	1912.76	3
215	0	0	0	1105.12	0
216	0	0	0	1168.52	10
217	0	0	0	2616.65	1
218	1	1	0	4055.49	12
219	0	0	0	1505.42	1
220	1	1	1	1050.04	19
221	0	0	0	3380.74	12
222	1	1	0	2525.7	19
223	0	0	0	1663.94	3
224	1	1	0	3308.69	17
225	0	1	0	1419.59	16
226	1	0	0	2014.92	8
227	0	0	0	2812	18
228	1	0	1	5092.42	20
229	0	1	0	2594.87	8
230	1	1	0	2722.01	21
231	1	1	0	838.036	12
232	0	0	0	1277.41	3
233	0	0	0	1697.24	8
234	0	0	0	816.58	0
235	1	1	1	1444.89	18
236	0	1	1	1223.29	5
237	0	0	0	1131.06	8
238	1	1	1	2953.22	22
239	0	0	1	1154.75	1
240	0	0	0	2909.35	0
241	1	0	1	1824.38	2
242	1	1	0	1295.66	2
243	0	0	1	1142.26	12
244	1	1	0	2252.54	14
245	0	0	1	3154.05	12
246	0	1	0	1165.34	10
247	0	0	0	1505.74	0
248	1	1	1	3121.02	17
249	0	0	1	2199.72	1
250	1	1	1	5200.67	0
251	1	0	0	2977.24	30
252	0	0	0	1417.03	1
253	1	0	0	1605.65	10
254	0	1	1	1821.81	14
255	1	1	0	5915.12	18
256	0	1	0	2530.18	3
257	1	1	0	2119	9
258	0	1	0	3562.96	14
259	1	1	1	1823.41	16
260	0	0	0	5070.33	15
261	1	1	0	4571.39	28
262	0	0	0	742.285	2
263	1	1	0	1130.24	13
264	1	1	1	3579.23	13
265	0	0	0	1537.93	11
266	1	1	0	4194.41	15
267	0	0	0	1820.49	10
268	0	0	0	2471.15	18
269	0	0	0	2888.66	16
270	1	1	0	1836.97	15
272	1	0	0	2317.51	10
273	1	0	1	714.316	10
274	0	1	0	1949.11	6
275	1	0	0	5007.25	5
276	1	0	0	1139.11	8
277	0	0	0	3280.83	2
278	0	0	0	1076.07	8
279	0	0	0	2036.53	3
280	0	0	1	900.263	5
281	0	0	0	1159.7	2
282	0	1	0	1821.13	8
